# Supplementary material for: The chaperone-like activity of the hepatitis C virus IRES and CRE elements regulates genome dimerization
Source: PubMed Central journal article supplement (PMC5324077; doi:10.1038/srep43415), 2017-02-24

1

2 **SUPPLEMENTARY DATA**

3

4

5 **The chaperone-like activity of the hepatitis C virus IRES and CRE**

6 **elements regulates genome dimerization**

7

8

9

10 Cristina Romero-López, Alicia Barroso-delJesus and Alfredo Berzal-Herranz

11

12 **Supplementary Table 1.** Oligonucleotides used to construct DNA plasmids described in this  
 13 study.

| Construct      | Oligonucleotides | Sequence (5'-3')                     |
|----------------|------------------|--------------------------------------|
| pGLI+CU_A288U  | A288U            | GGCCTTGTGGTTCTGCCTGATAGGGT           |
|                | asHCV-276        | TTTCGCGACCCAACACTACTCGGCTA           |
| pGLI+CU_U297A  | U297A            | GGCCTTGTGGTACTGCCTGAAAGGGT           |
|                | asHCV-276        | TTTCGCGACCCAACACTACTCGGCTA           |
| pGLI+CU_PK2R   | A288U/U297A      | GGCCTTGTGGTTCTGCCTGAAAGGGT           |
|                | asHCV-276        | TTTCGCGACCCAACACTACTCGGCTA           |
| pGLI+CU_G150C  | G150C            | TAGTGGTCTCCGGAACCGGTGAGTA            |
|                | asHCV-140        | TGGCTCTCCCGGGAGGGGGGGTCTCGGA         |
| pGLI+CU_Mut3   | C242A            | GGGCGUGCCCCCGAAGACTGCTA              |
|                | asHCV-228        | AAATCTCCAGGCATTGAGCGGGTT             |
| pGLI+CU_3R     | C242G            | GGGCGTCCCCCGGAAGACTGCTA              |
|                | asHCV-228        | AAATCTCCAGGCATTGAGCGGGTT             |
| pGLI+CU_3c     | 3c_BiloopAG      | GGGCAGGCCCCCGCAAGACTGCTA             |
|                | asHCV-228        | AAATCTCCAGGCATTGAGCGGGTT             |
| pGLI+CU_d3d    | asHCV-252        | TAGCAGTCTTGCGGGGGCAGGCCCAA           |
|                | HCV-284          | GTGGTACTGCCTGATAGGGTGCCTTGCGAGT      |
| pGLI+CU_dIL3d  | HCVInser_275CT   | GCCGAGTAGTGTTGGGTGCGGACTAGGCCTT      |
|                | asHCV-252        | TAGCAGTCTTGCGGGGGCAGGCCCAA           |
| pGLI+CU_Pu     | HCV-311mut319    | GTGCCCCGCCTCTCTCGTAGACCGT            |
|                | asHCV-310        | TCGCAAGCACCTATCAGGCAGTA              |
| pGLI+CU_Py     | HCV-120mut125    | CCCCGGAGGGCGGAAAGCCATAGT             |
|                | asHCV-119        | TCCTGGAGGCTGCACGACATCAT              |
| pGLI+CU_Py/Pu  | HCV-311mut319    | GTGCCCCGCCTCTCTCGTAGACCGT            |
|                | asHCV-310        | TCGCAAGCACCTATCAGGCAGTA              |
| pGLI+CU_d3.1   | HCV-9260         | TTACAGCGGGGAGACATATATCACAG           |
|                | asHCV-9215       | GATTGGAGTGAGTTTGAGCTTGGTCCT          |
| pGLI+CU_d3.2   | HCV-9311         | GTTTATGTGGTGCCTACTCTACTTTCTGTA       |
|                | asHCV-9262       | TAACCAGCAACGAACCAGCTGGATAAAATCCAA    |
| pGLI+CU_d3.3   | HCV-9352         | TCTATCTACTCCCAACCGATGAACGG           |
|                | asHCV-9320       | CCACATGAACCAGCGGGGTCGGGCA            |
| pGLI+CU_d3.4   | HCV-9384         | TAAACACTCCAGGCCAATAGGCCA             |
|                | asHCV-9358       | GCTCCCCGTTTATCGGTT                   |
| pGLI+CU_dHV    | HCV-9507         | TATGGTGGCTCCATCTTAGCCCTA             |
|                | asHCV-9384muta   | AGCTCCCCGTTTATCGGTTGGGGAGT           |
| pGLI+CU_dimUU  | HCV-9553         | CGTGAGCCGCATGACTGCAGAGA              |
|                | Dim_Mut_UU       | GACCTTTCACAGCAAGCCGTGATTA            |
| pGLI+CU_d3'SL1 | 5'T7pHCV         | TAATACGACTCACTATAGGGATGGAAGCCAAAAACA |
|                | asHCV-9560       | GGCTCACGGACCTTTCACAGCTA              |

40 **Supplementary Table 2.** Oligonucleotides used in this study.

| <b>Oligonucleotide</b> | <b>Sequence (5'-3')</b>                                                 |
|------------------------|-------------------------------------------------------------------------|
| <b>5'T7pHCV</b>        | <u>TAATACGACTCACTATAGCCAGCCCCCTGATGG</u>                                |
| <b>5'T7pHCV-9181</b>   | <u>TAATACGACTCACTATAGGGCAGTAAGGACCAAGCTCAA</u>                          |
| <b>3'HCV</b>           | ACTTGATCTGCAGAGAGGCCA                                                   |
| <b>3'HCV_cassette</b>  | GAACCGGACCGAAGCCCGATTTGGATCCGGCGAACCGGATCGAACAT<br>GATCTGCAGAGAGGCCAGTA |
| <b>asHCV-9585</b>      | GTATCAGCACTCTCTGCAGT                                                    |
| <b>Primer Std</b>      | GAACCGGACCGAAGCCCG                                                      |

41

42 Promoter sequence for the T7 RNA polymerase is underlined.

43

44 **Supplementary Figure S1.** The 3'SLI interferes with the efficient dimer formation. Dimerization  
45 efficiency was assayed at increasing concentrations of 3'X and X55, which contains only the  
46 3'SLIII and 3'SLII domains required for HCV genomic dimerization (40). Dimeric products were  
47 resolved by native TBM polyacrylamide gel electrophoresis. A representative image of the  
48 electrophoretic mobility shift assays is shown. Relative dimer formation for each transcript was  
49 quantified. M, monomer; D, dimer.

50

51

52

53

54

55

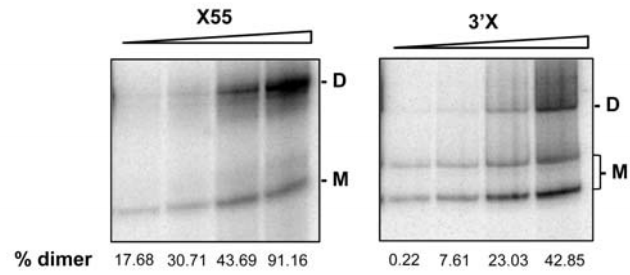

56

57

58

59

60

61

62 **Supplementary Figure S2.** Identification of nucleotides influencing dimer formation in the CRE  
 63 region of the HCV genome. Nucleotides required for dimer formation were identified by 2'-  
 64 hydroxyl molecular interference (HMX). A) Molecule CU was modified with NMIA under  
 65 denaturing conditions. The monomeric and dimeric populations were then partitioned by native  
 66 polyacrylamide gel electrophoresis. Modified positions were detected as stops in a reverse  
 67 transcription reaction. Histograms show the NMIA reactivity profile for each of the isolated pools,  
 68 M (monomer) and D (dimer). Data are the mean of three independent experiments  $\pm$  standard  
 69 deviation. Different accessibility values are colour coded as indicated. HMX profiles shown in  
 70 the bottom panel correspond to difference in NMIA reactivity between the monomeric and the  
 71 dimeric conformations (M-D) for the CU transcript. HMX scores indicated at precise positions  
 72 were calculated from the reactivity profiles of the monomeric and dimeric isoform, as previously  
 73 described {Homan, 2014 #2794}. B) Sequence and secondary structure of CU, summarizing the  
 74 HMX results. Filled circles: increase ( $>0.25$  units) in NMIA relative reactivity for the monomer  
 75 (M) compared to the dimer (D), with HMX score  $>0.55$ ; open circles: increase ( $>0.25$  units)  
 76 NMIA relative reactivity for the dimer (D) compared to the monomer (M), with HMX score  $>0.55$ .

77 **A)**

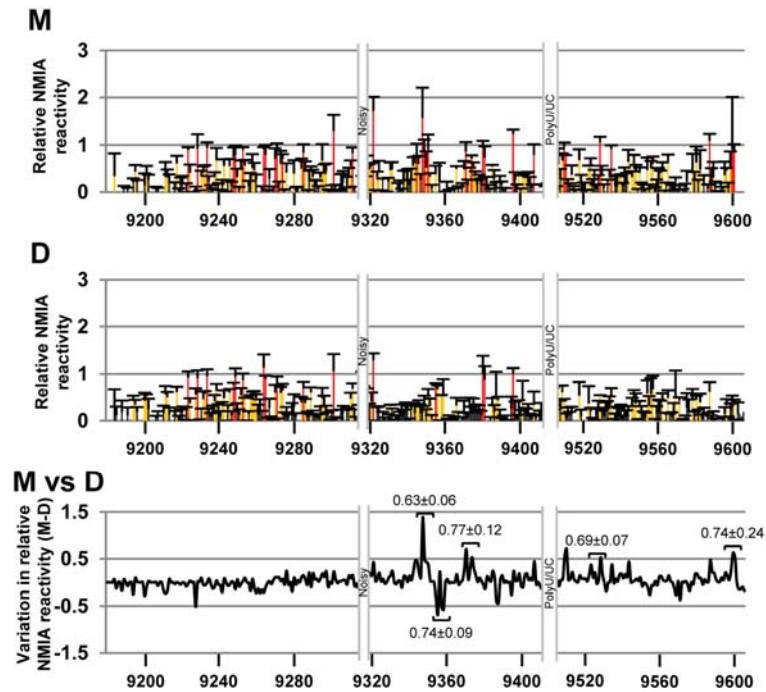

89 **B)**

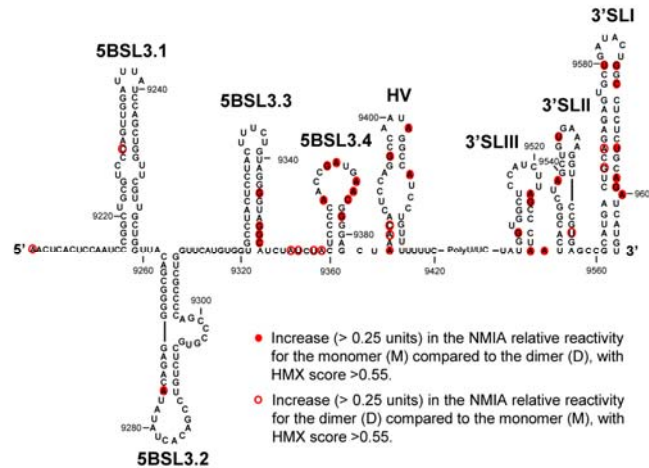

90 **Supplementary Figure S3.** Line graph showing the differential SHAPE reactivities for the  
91 transcripts CU and I+CU calculated by scaling 1M6 to NMIA relative values and then subtracting  
92 corrected 1M6 from NMIA reactivity data, under monomeric (A) or dimeric (B) conditions.

93

94

95

**A)**

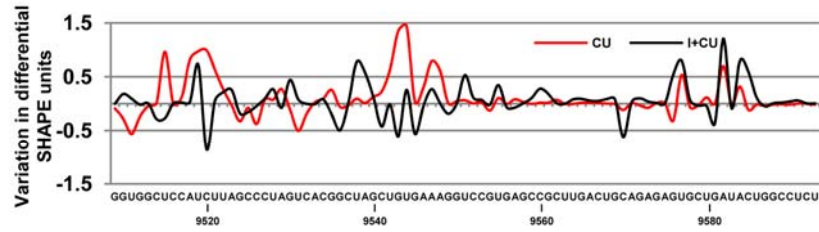

**B)**

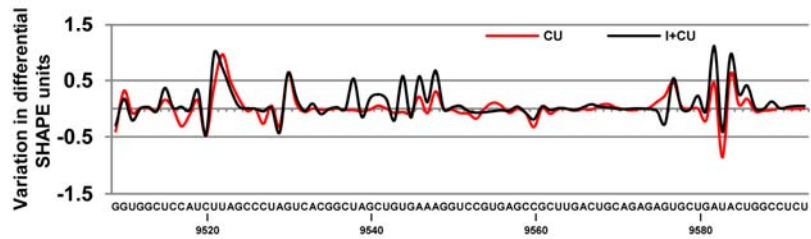

Supplement: srep43415-s1.pdf [file srep43415-s1.pdf]
